# Supplementary material
Source: MDPI journal article supplement (https://www.mdpi.com/2297-8739/10/5/281)
Supplement: s1 [file s1]

**Cellulose paper sorptive extraction (CPSE) combined with gas chromatography–mass spectrometry (GC-MS) for facile determination of lorazepam residues in food samples involved in drug facilitated crimes**

**Bharti Jain<sup>1,2#</sup>, Rajeev Jain<sup>\*1#</sup>, Abuzar Kabir<sup>3</sup>, Abhishek Ghosh<sup>4</sup>, Torki Zughaibi<sup>5,6</sup>,  
Vimukti Chauhan<sup>1</sup>, Sonali<sup>2</sup>, Shweta Sharma<sup>\*2</sup>**

**1.** Central Forensic Science Laboratory, Dakshin Marg, Sector–36A, Chandigarh (India) – 160036.

**2.** Institute of Forensic Science & Criminology, Panjab University, Chandigarh-160014, India

**3.** International Forensic Research Institute, Department of Chemistry and Biochemistry, Florida International University, Miami, FL, USA

**4.** Department of psychiatry, Postgraduate Institute of Medical Education & Research, Chandigarh, India – 160012

**5.** Department of Medical Laboratory Sciences, Faculty of Applied Medical Sciences, King Abdulaziz University, Jeddah 21589, Saudi Arabia

**6.** King Fahd Medical Research Center, King Abdulaziz University, Jeddah 21589, Saudi Arabia

---

**\*Corresponding Authors:**

[rajeevjaincfsl@gmail.com](mailto:rajeevjaincfsl@gmail.com) (Rajeev Jain)

[25shweta@pu.ac.in](mailto:25shweta@pu.ac.in) (Shweta Sharma)

**#Authors contributed equally**

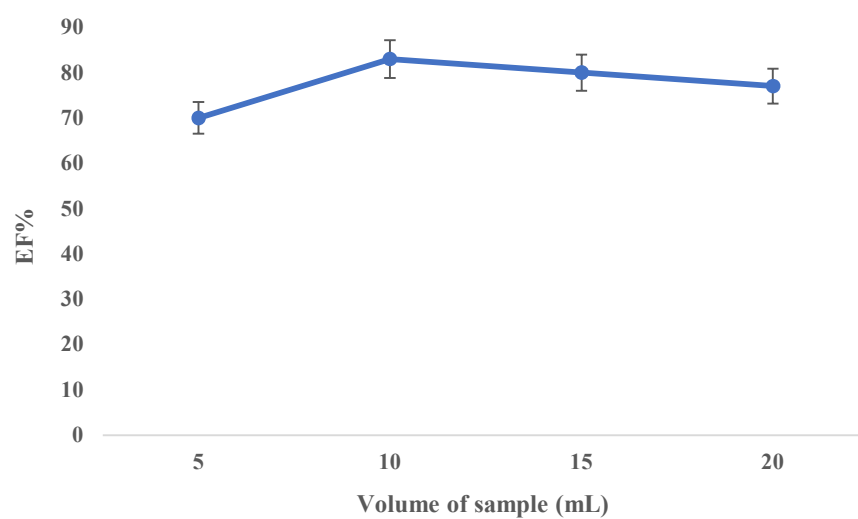

**Figure S1** The effect of volume of sample on the EF of LZ by CPSE procedure.

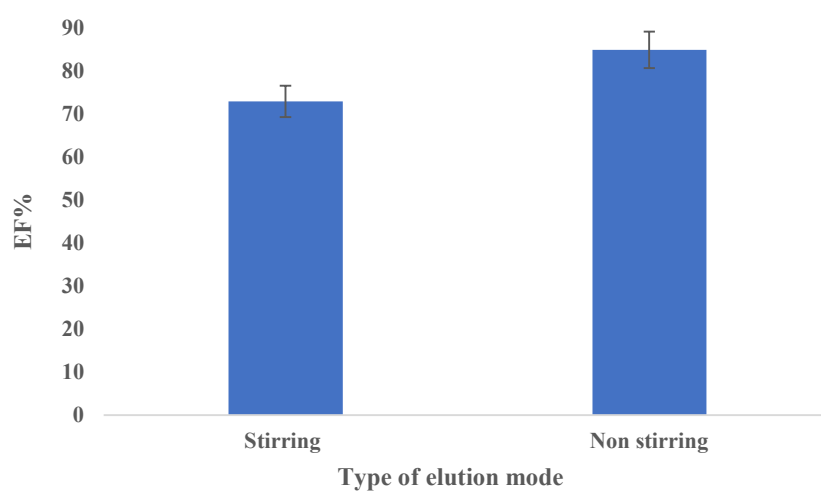

**Figure S2** Effect of stirring on elution of LZ from CPSE procedure.
